# Supplementary material for: Is There a Relationship between Surface Wettability of Structured Surfaces and Lyophobicity toward Liquid Metals?
Source: MDPI journal article supplement (doi:10.3390/ma13102283), 2020-05-15
Supplement: s1 [file s1]

Article

# Is There a Relationship between Surface Wettability of Structured Surfaces and Lyophobicity toward Liquid Metals?

Stephan Handschuh-Wang <sup>1,\*</sup>, Lifei Zhu <sup>1</sup>, Tiansheng Gan <sup>1</sup> and Tao Wang <sup>2</sup>

<sup>1</sup> College of Chemistry and Environmental Engineering, Shenzhen University, Shenzhen 518055, China; 1800221021@email.szu.edu.cn (L.Z.); gantiansheng@szu.edu.cn (T.G.)

<sup>2</sup> Functional Thin Films Research Center, Shenzhen Institutes of Advanced Technology, Chinese Academy of Sciences, Shenzhen 518055, China; tao.wang1@siat.ac.cn

\* Correspondence: stephan@szu.edu.cn; Tel.: (+86)-755-2653-6627

Received: 20 April 2020; Accepted: 13 May 2020; Published: date

## Supporting information

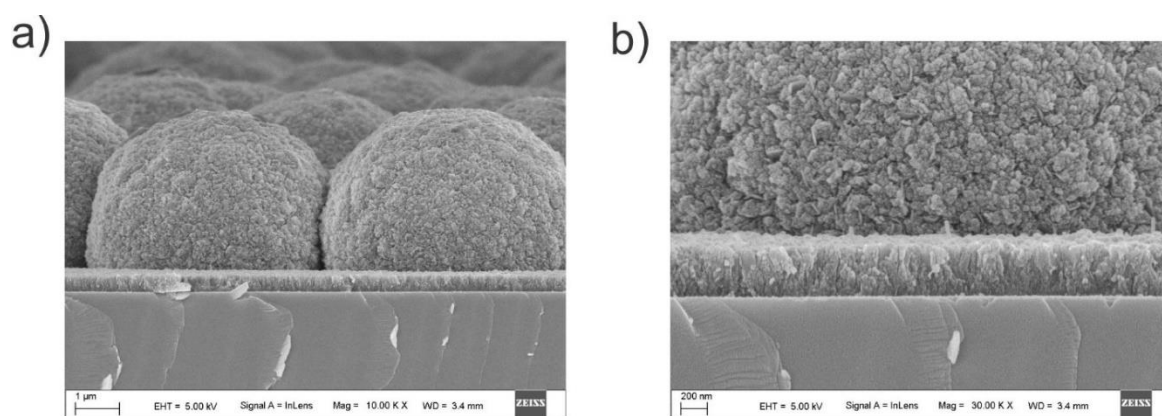

**Figure S1.** Structured diamond coating on Si. SEM cross-sectional view of the diamond coating (a) and its magnification (b).

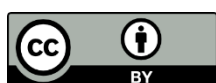

© 2020 by the authors. Submitted for possible open access publication under the terms and conditions of the Creative Commons Attribution (CC BY) license (<http://creativecommons.org/licenses/by/4.0/>).
